# Supplementary material for: Effects of Shade Nets on Microclimatic Conditions, Growth, Fruit Yield, and Quality of Eggplant (Solanum melongena L.): A Case Study in Carnarvon, Western Australia
Source: MDPI journal article supplement (doi:10.3390/horticulturae8080696), 2022-08-01
Supplement: s1 [file s1]

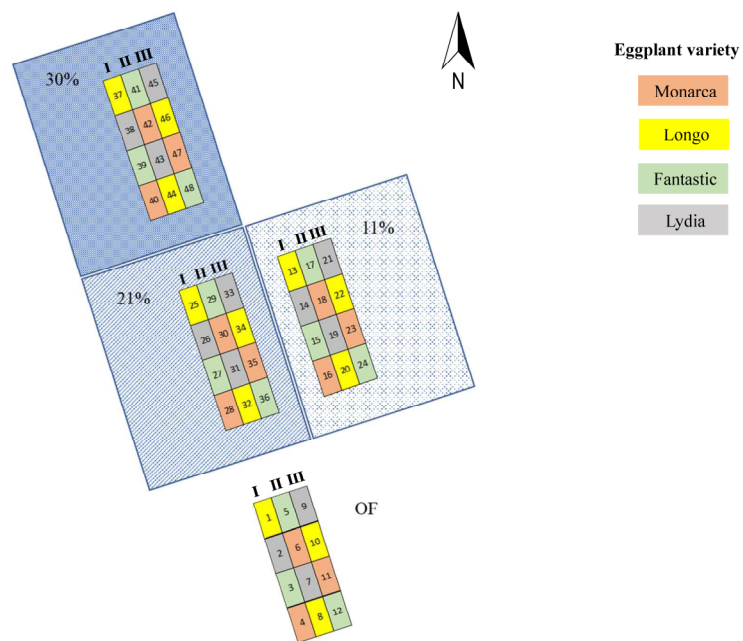

**Figure S1.** Experimental layout of four eggplant varieties under different shade nets and open field (OF).

**Table S1.** Fertilizing program of the eggplant trial.

| Element    | Fertilising program (kg. ha <sup>-1</sup> ) |             |       |
|------------|---------------------------------------------|-------------|-------|
|            | Basal                                       | Fertigation | Total |
| Nitrogen   | 30                                          | 241         | 271   |
| Phosphorus | 97                                          | -           | 97    |
| Potassium  | 166                                         | 161         | 327   |
| Magnesium  | 20                                          | 16          | 36    |
| Calcium    | 296                                         | 133         | 429   |
| Copper     | 2.1                                         | -           | 2.1   |
| Molybdenum | 0.21                                        | -           | 0.21  |
| Manganese  | 7.75                                        | -           | 7.75  |
| Zinc       | 9.3                                         | -           | 9.3   |
